# Supplementary material
Source: Springer Nature journal article supplement (https://www.springermedizin.de/resource/supplementary/12889_2004_156_MOESM3_ESM.pdf/9500458)

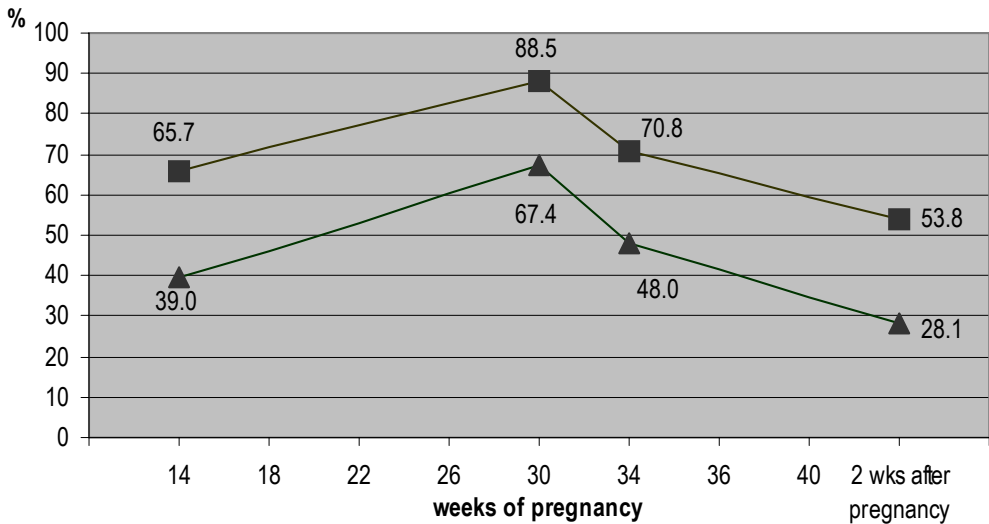

Supplement: MOESM3 [file 9500458]
